# Supplementary material
Source: Springer Nature journal article supplement (https://www.springermedizin.de/resource/supplementary/13221_2014_85_MOESM5_ESM.pdf/9680930)

Monolayer

Enriched

COSB

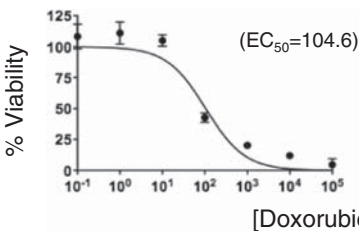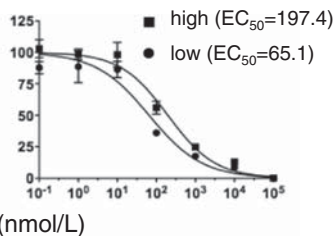

DD1

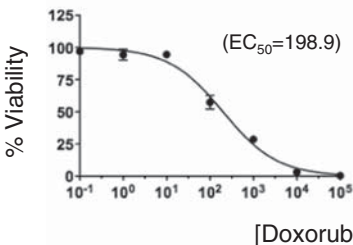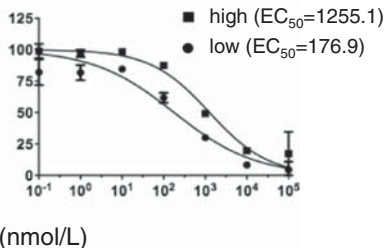

AS5

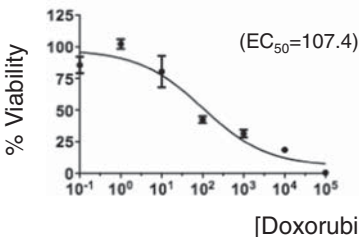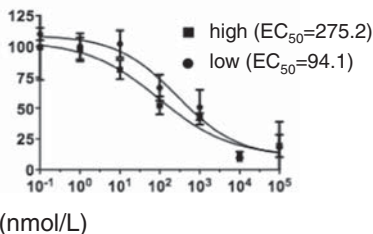

Supplement: MOESM5 [file 9680930]
